# Supplementary material
Source: Springer Nature journal article supplement (https://www.springermedizin.de/resource/supplementary/12963_2012_206_MOESM4_ESM.pdf/9572344)

Height-for-age Z score

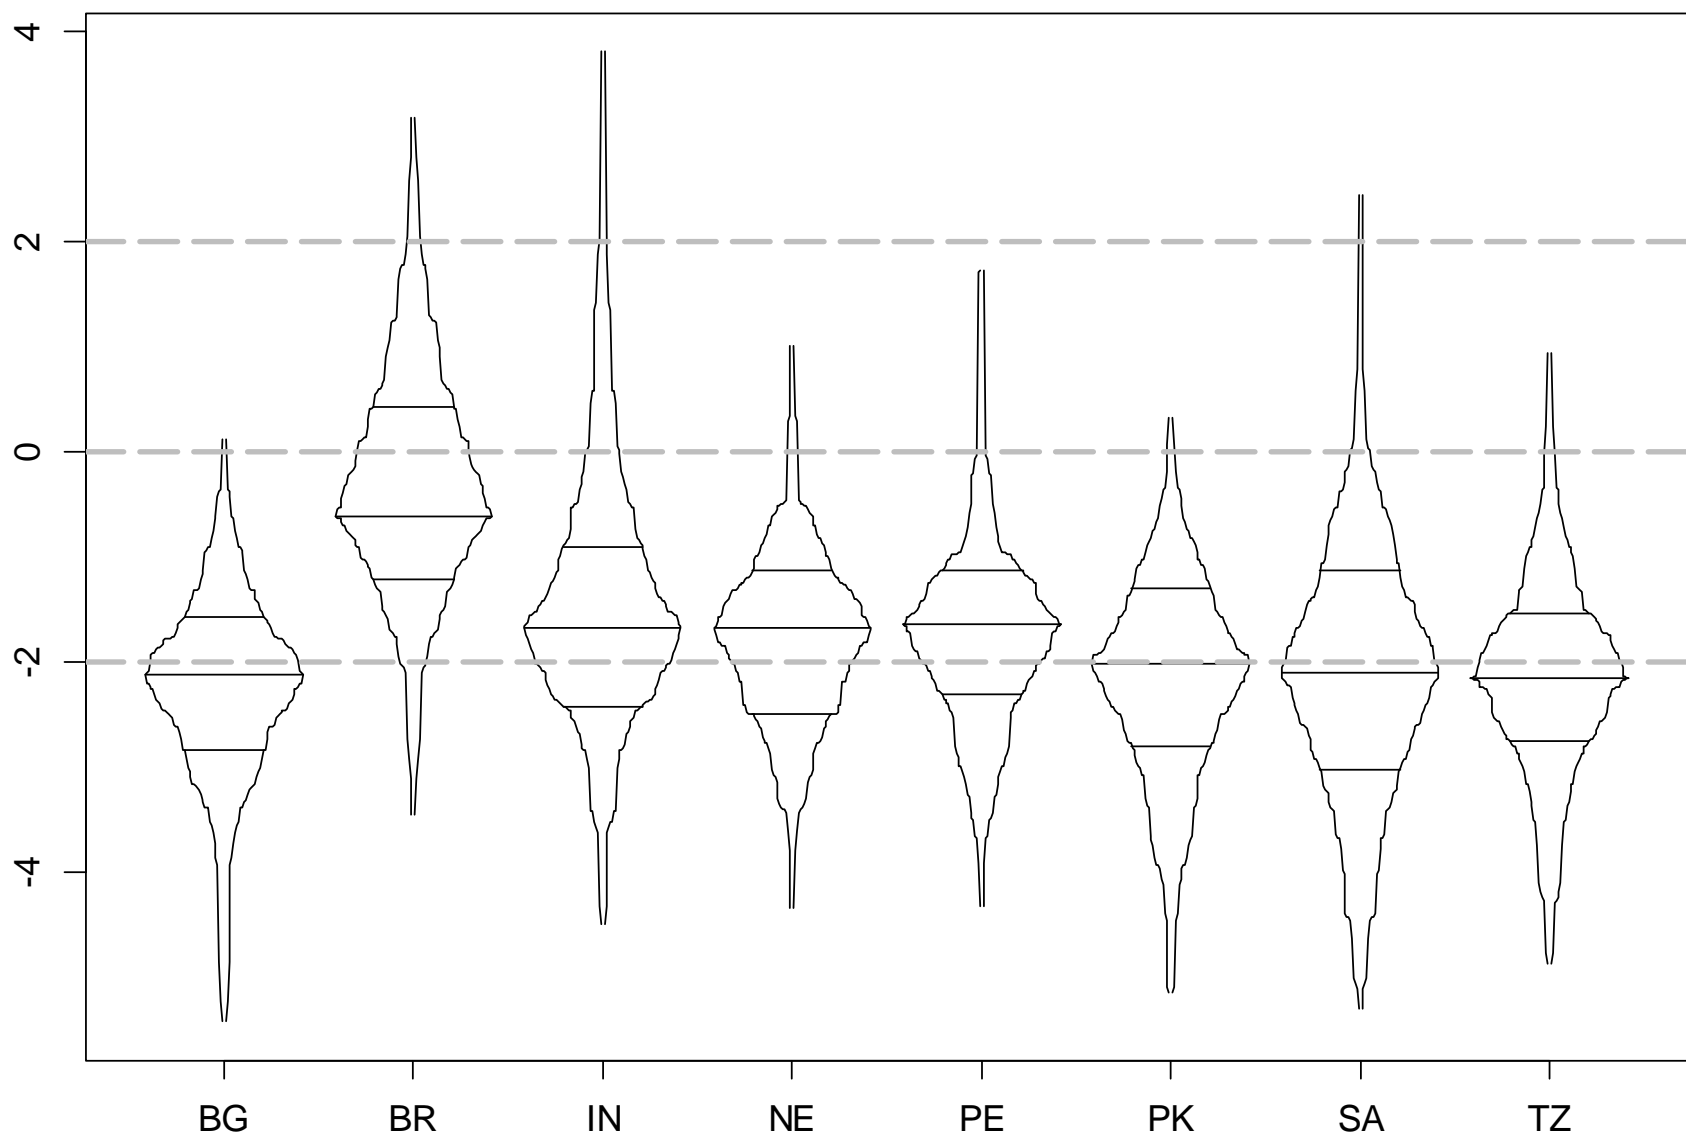

Supplement: MOESM4 [file 9572344]
